# Supplementary material for: Visible and near-infrared driven Yb3+/Tm3+ co-doped InVO4 nanosheets for highly efficient photocatalytic applications
Source: Royal Society of Chemistry journal article supplement (doi:10.1039/d0dt02318c), 2020-01-01
Supplement: d0dt02318c1.pdf [file d0dt02318c1.pdf]

## Supplementary materials

# A visible and near-infrared driven Yb<sup>3+</sup>/Tm<sup>3+</sup> co-doped InVO<sub>4</sub> nanosheets for highly efficient photocatalytic applications

Kailian Zhang,<sup>a</sup> Jie Guan,<sup>a</sup> Ping Mu,<sup>a</sup> Kai Yang,<sup>\*a,d</sup> Yu Xie,<sup>c</sup> Xiaoxiao Li,<sup>a</sup> Laixi Zou,<sup>\*a</sup> Weiya Huang,<sup>a</sup> Changlin Yu,<sup>\*b</sup> Wenxin Dai<sup>d</sup>

*a, School of Chemistry and Chemical Engineering, Jiangxi University of Science and Technology, Ganzhou 341000, Jiangxi, China*

*b, School of Chemical Engineering, Key Laboratory of Petrochemical Pollution Process and Control, Guangdong Province, Guangdong University of Petrochemical Technology, Maoming 525000, Guangdong, China*

*c, College of Environment and Chemical Engineering, Nanchang Hangkong University, Nanchang 330063, PR China*

*d, Research Institute of Photocatalysis, State Key Laboratory of Photocatalysis on Energy and Environment, Fuzhou University, Fuzhou, 350002, China*

1. \*Corresponding author: Kai Yang, Ph. D. Associate Professor

Tel/Fax: +86-797-8312334

E-mail: [19979706763@126.com](mailto:19979706763@126.com)

2. \*Corresponding author: Laixi Zou, Ph. D

Tel/Fax: +86-797-8312334

E-mail: [zoulaixi@jxust.edu.cn](mailto:zoulaixi@jxust.edu.cn)

3. \*Corresponding author: Changlin Yu, Ph. D. Professor

Tel/Fax: +86-668-2982253

E-mail: [yuchanglinjx@163.com](mailto:yuchanglinjx@163.com)

**Table S1** Band gap energies of the obtained samples

| Samples   | Band gap ( $E_g$ /eV) | Samples  | Band gap ( $E_g$ /eV) |
|-----------|-----------------------|----------|-----------------------|
| IV        | 2.070                 | 0.5YT-IV | 1.955                 |
| 2.5 YT-IV | 1.945                 | 5 YT-IV  | 1.953                 |
| 10 YT-IV  | 1.964                 | 20 YT-IV | 1.952                 |

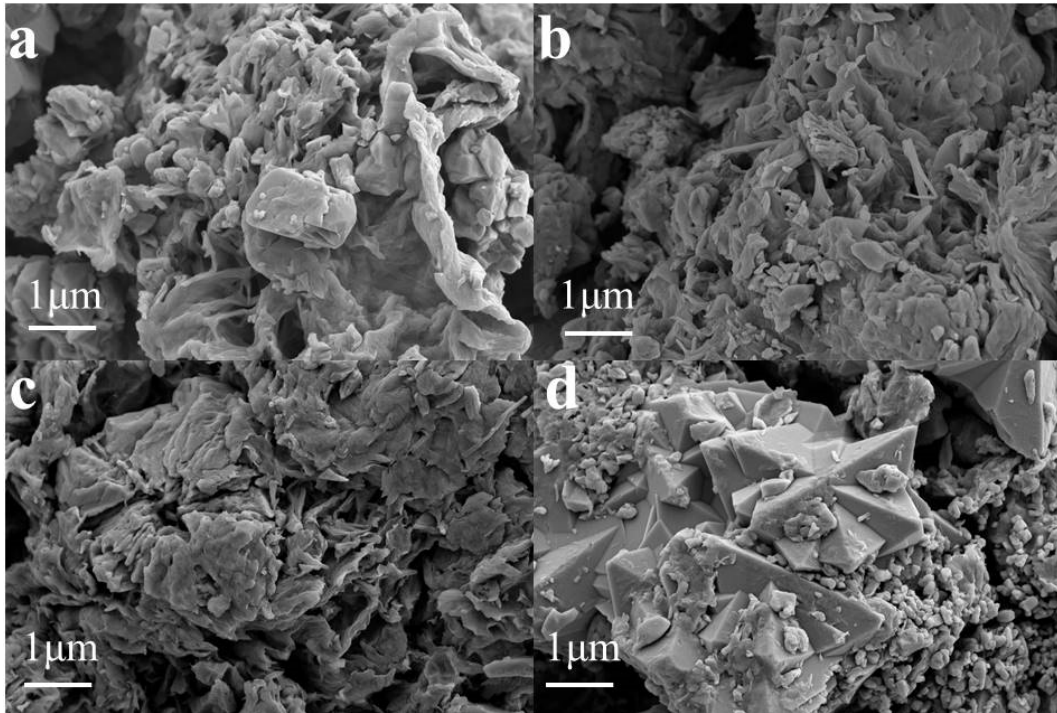

**Fig. S1** SEM images of 0.5YT-IV (a), 2.5 YT-IV (b), 10 YT-IV (c) and 20YT-IV (d) samples.

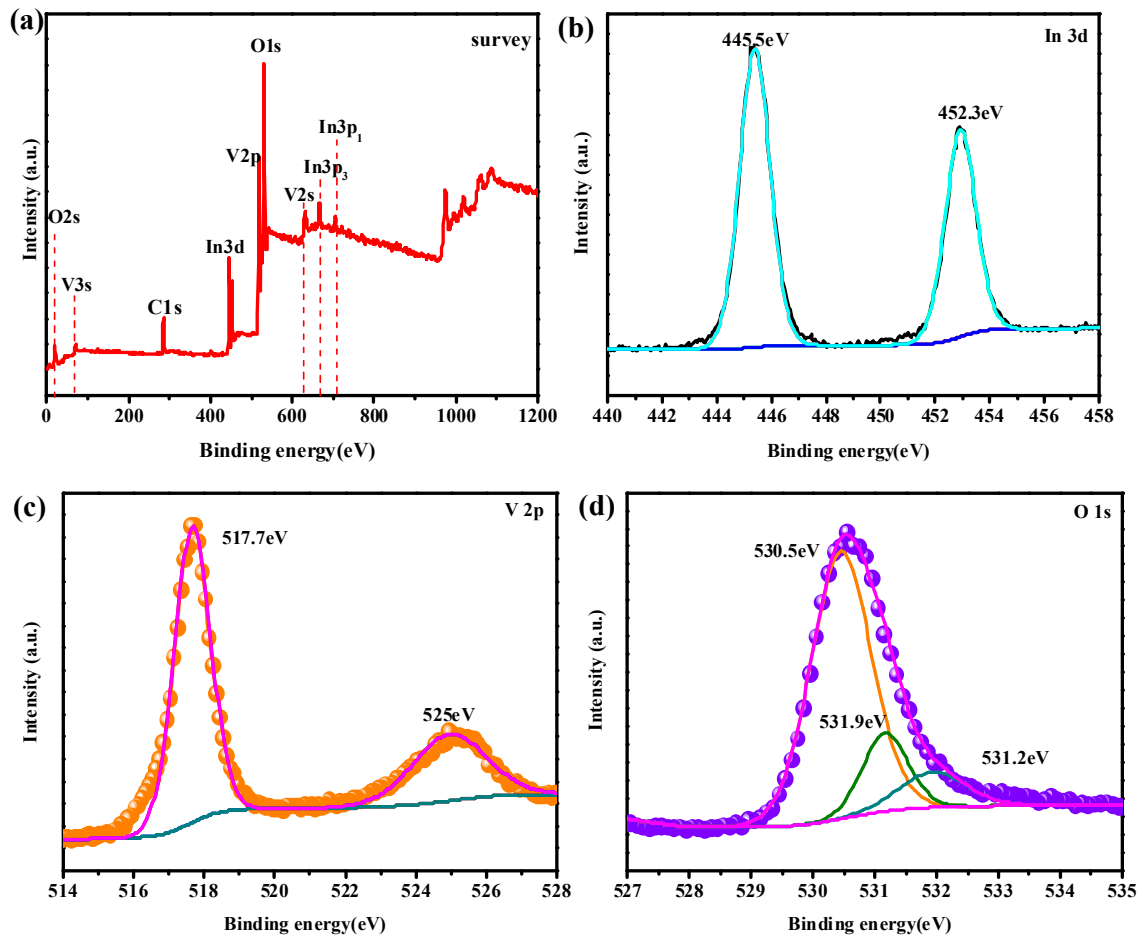

Fig. S2 XPS spectra of IV nanosheets: (a) Survey, (b) In 3d, (c) V 2p, (d) O 1s.

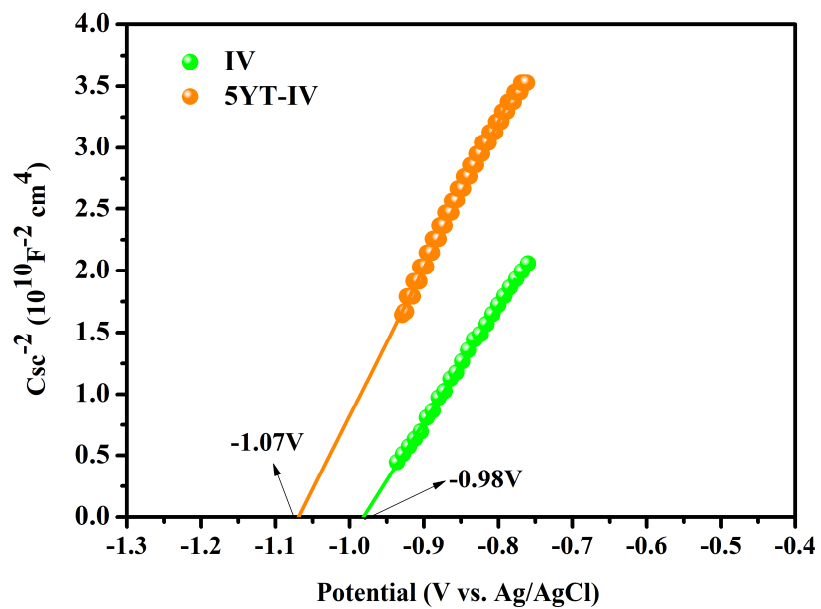

Fig. S3 Mott-Schottky plots of bare IV and 5YT-IV samples.

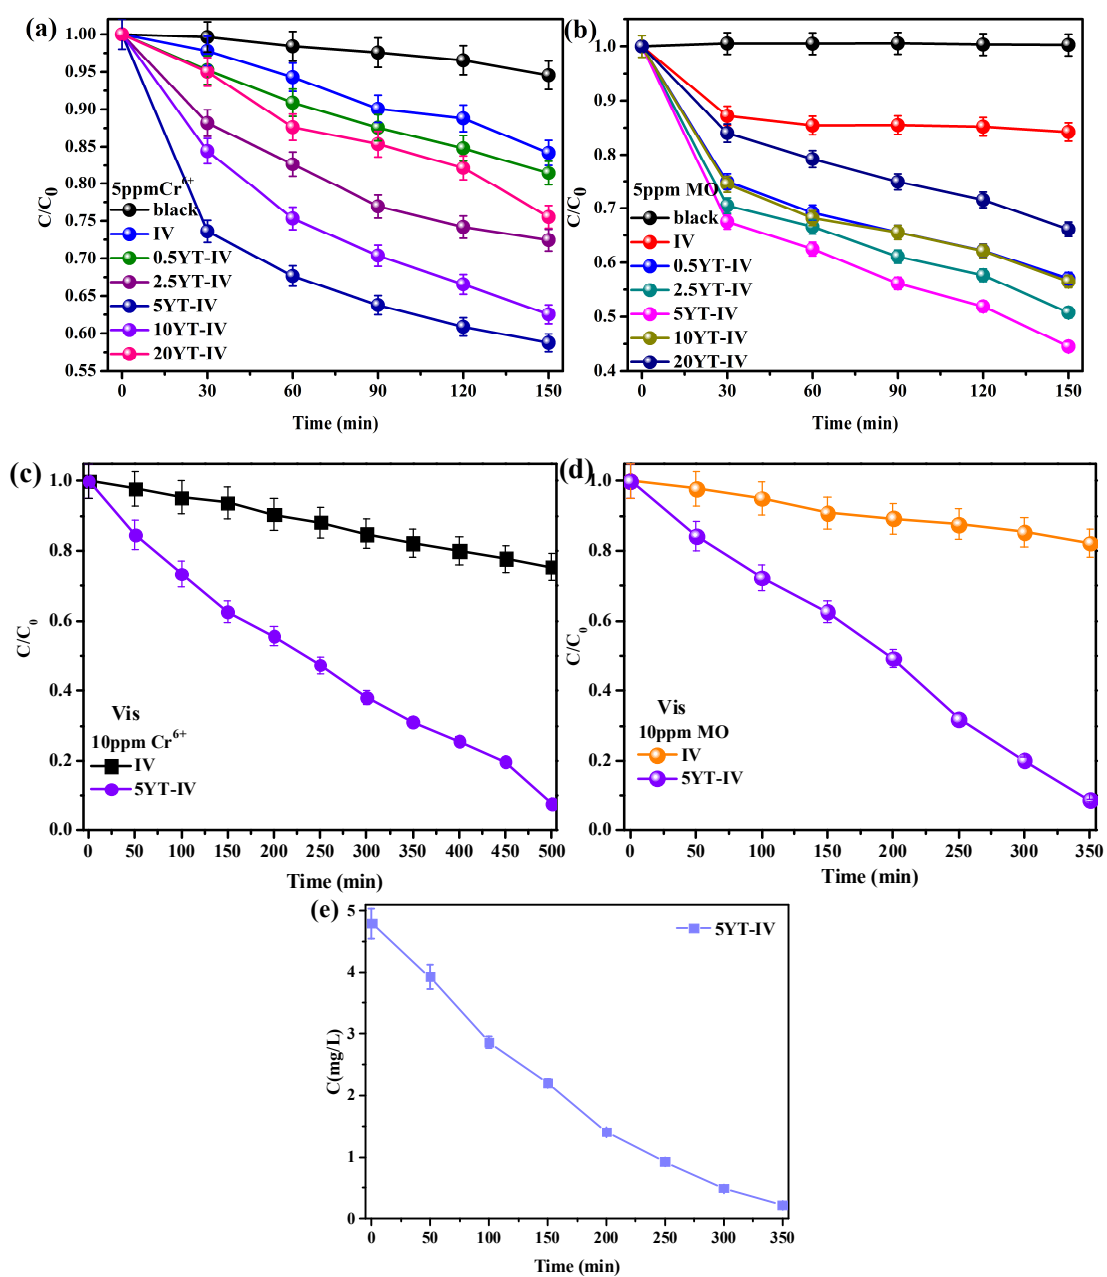

**Fig. S4** The photocatalytic performance of 5 ppm (a) and 10 ppm (c) Cr(VI) reduction as well as 5 ppm (b) and 10 ppm (d) MO degradation under visible light irradiation; Plot of the change of TOC of MO as the time over 5YT-IV sample (e).

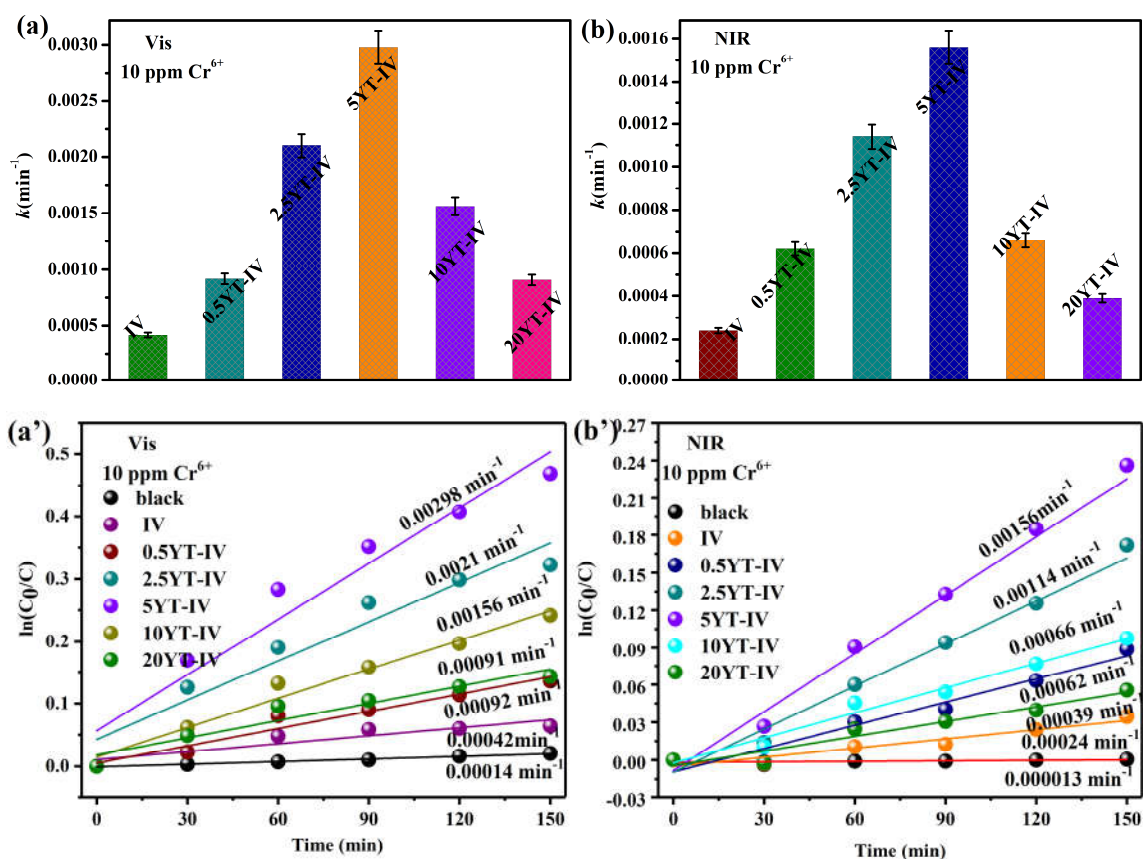

**Fig. S5** The reaction rate constant (a and b) and first-order-kinetics (a' and b') of Cr(VI) reduction over as-synthesized YT-IV photocatalysts under visible and NIR light irradiation.

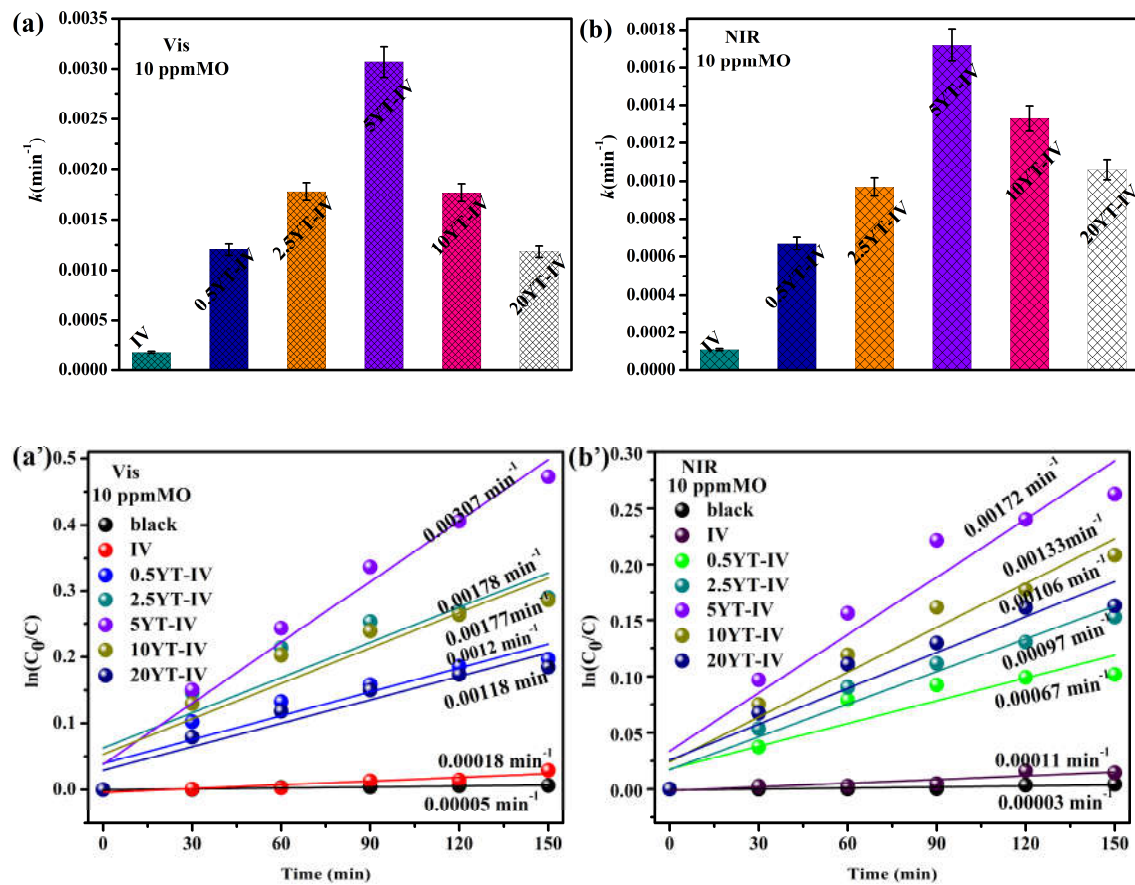

**Fig. S6** The reaction rate constant (a and b) and first-order-kinetics (a' and b') of MO degradation over as-synthesized YT-IV photocatalysts under visible and NIR light irradiation.



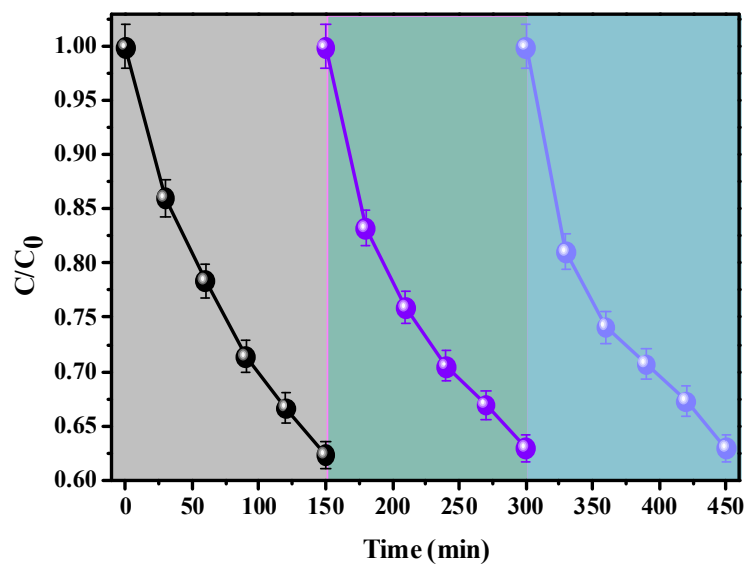

**Fig. S7** The photocatalytic stability for the recycling reaction for the MO degradation over 5YT-IV.

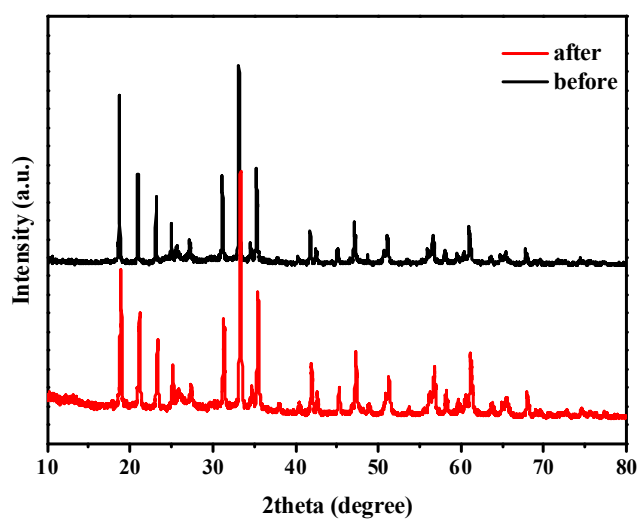

**Fig. S8** The comparison of the XRD patterns of before and after used 5YT-IV samples.

**Table S2** Comparison of dye degradation between our material and similar reported Yb<sup>3+</sup>/Tm<sup>3+</sup> co-doped materials in the literature

| Photocatalyst                                                                                            | Light source | Light source pollutant (mg/ mL) | Degradation rate/Time (min) | Ref              |
|----------------------------------------------------------------------------------------------------------|--------------|---------------------------------|-----------------------------|------------------|
| BiOI/ZnWO <sub>4</sub> :Er <sup>3+</sup> , Tm <sup>3+</sup> , Yb <sup>3+</sup>                           | NIR light    | MO (40mg/10ppm)                 | 15%/150                     | 1                |
| BiVO <sub>4</sub> /CaF <sub>2</sub> :Er <sup>3+</sup> , Tm <sup>3+</sup> , Yb <sup>3+</sup>              | NIR light    | MO (20mg/10ppm)                 | 4%/150                      | 2                |
| YF <sub>3</sub> :Yb <sup>3+</sup> , Tm <sup>3+</sup> /TiO <sub>2</sub>                                   | NIR light    | MB(0.5 mg/15ppm)                | 20.8%/150                   | 3                |
| BiPO <sub>4</sub> :Yb <sup>3+</sup> , Tm <sup>3+</sup> /BiVO <sub>4</sub>                                | NIR light    | MB(30 mg/5ppm)                  | 3.5%/150                    | 4                |
| β-NaYF <sub>4</sub> :Yb <sup>3+</sup> , Tm <sup>3+</sup> @TiO <sub>2</sub>                               | NIR light    | MO(5 mg /20 ppm)                | 5% /150                     | 5                |
| Ti <sub>3</sub> C <sub>2</sub> -OH/Bi <sub>2</sub> WO <sub>6</sub> : Yb <sup>3+</sup> , Tm <sup>3+</sup> | NIR light    | RhB(10 mg/10 ppm)               | 30%/150                     | 6                |
| InVO <sub>4</sub> : Yb, Tm                                                                               | NIR light    | MO(15 mg /10 ppm)               | 21.3%/150                   | <b>This work</b> |

## References

- [1] S.Q. Huang, Y.M. Feng, L.H. Han, W.L. Fan, X. Zhao, Z.Y. Lou, Z.B. Qi, B. Yua and N.W. Zhu, *RSC Adv.*, 2014, 4, 61679- 61686.
- [2] S.Q. Huang, N.W. Zhu, Z.Y. Lou, L. Gu, C. Miao, H.P. Yuan and A.D. Shan, *Nanoscale*, 2014, 6, 1362- 1368.
- [3] W.P. Qin, D.S. Zhang, D. Zhao, L.L. Wang and K.Z. Zheng, *Chem. Commun.*, 2010, 46, 2304–2306.
- [4] S. Ganguli, C. Hazra, M. Chatti, T. Samanta and V. Mahalingam, *Langmuir*, 2016, 32, 247–253.
- [5] D.X. Xu, Z.W. Lian, M.L. Fu, B.I. Yuan, J.W. Shi and H.J. Cui, *Appl. Catal. B: Environ.*, 2013, 142-143, 377-386.
- [6] H.J. Fang, Y.S. Pan, M.Y. Yin, C.L. Pan, *Mater. Res. Bull.*, 2020, 121,110618-110628.
